# Supplementary material for: Solution and precipitation based radical polymerization of renewable vinyl lactones in renewable solvents
Source: Royal Society of Chemistry journal article supplement (doi:10.1039/d5ra02151k), 2025-01-01
Supplement: d5ra02151k1.pdf [file d5ra02151k1.pdf]

## Supporting Information For

### Solution and Precipitation Based Radical Polymerization of Renewable Vinyl Lactones in Renewable Solvents

Dimitrios Apostolidis, William E. Dyer, Clemens A. Dransfeld, Baris Kumru\*

Aerospace Structures & Materials Department, Faculty of Aerospace Engineering, Delft University of Technology, 2629 HS Delft, Netherlands

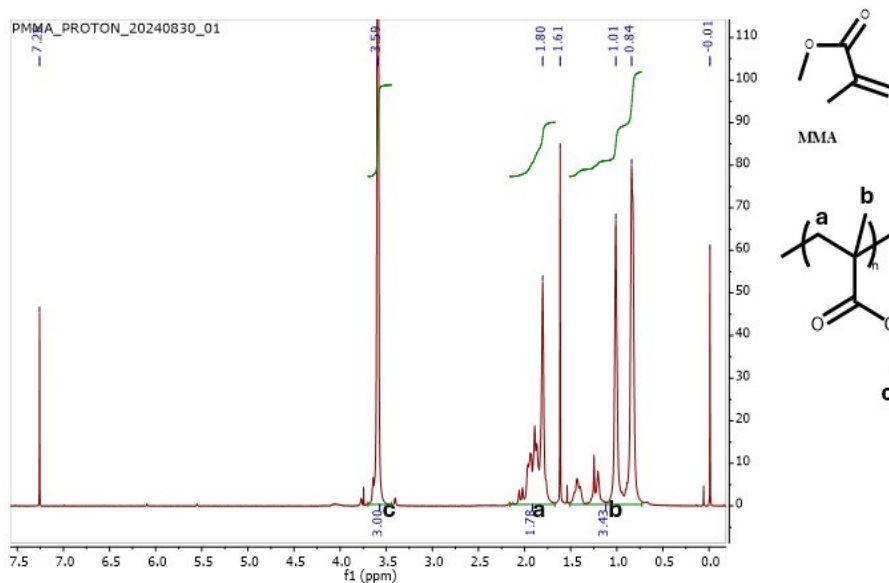

Figure S1.  $^1\text{H}$ -NMR of commercial PMMA.

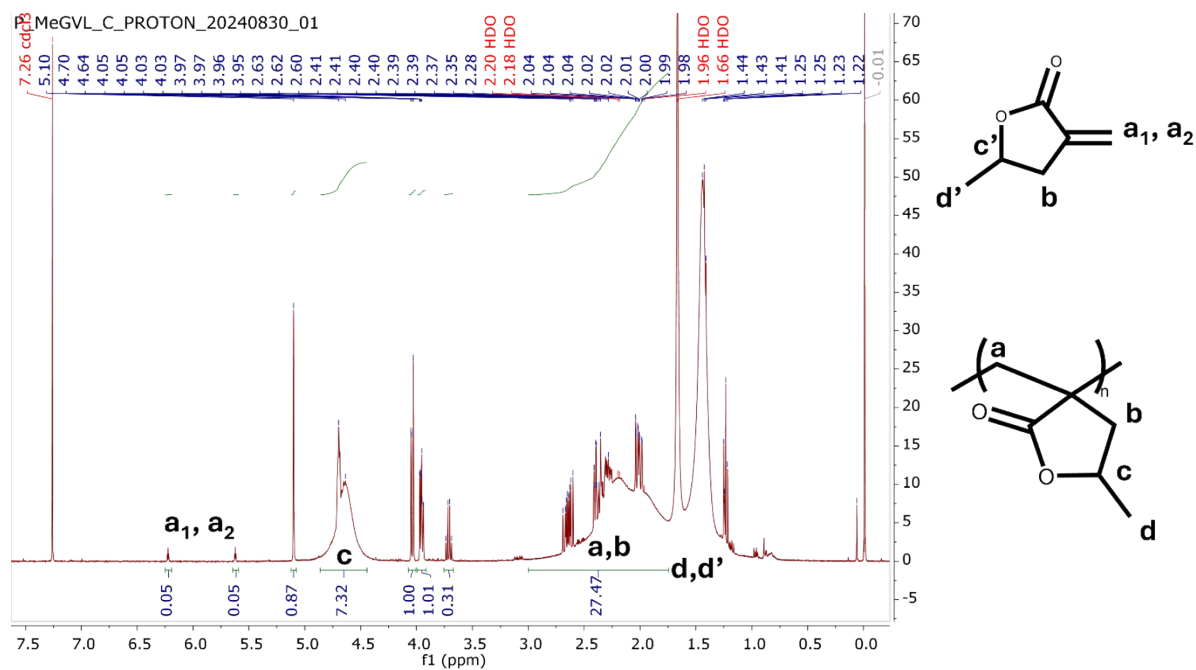

Figure S2.  $^1\text{H}$ -NMR of PMeGVL-s.

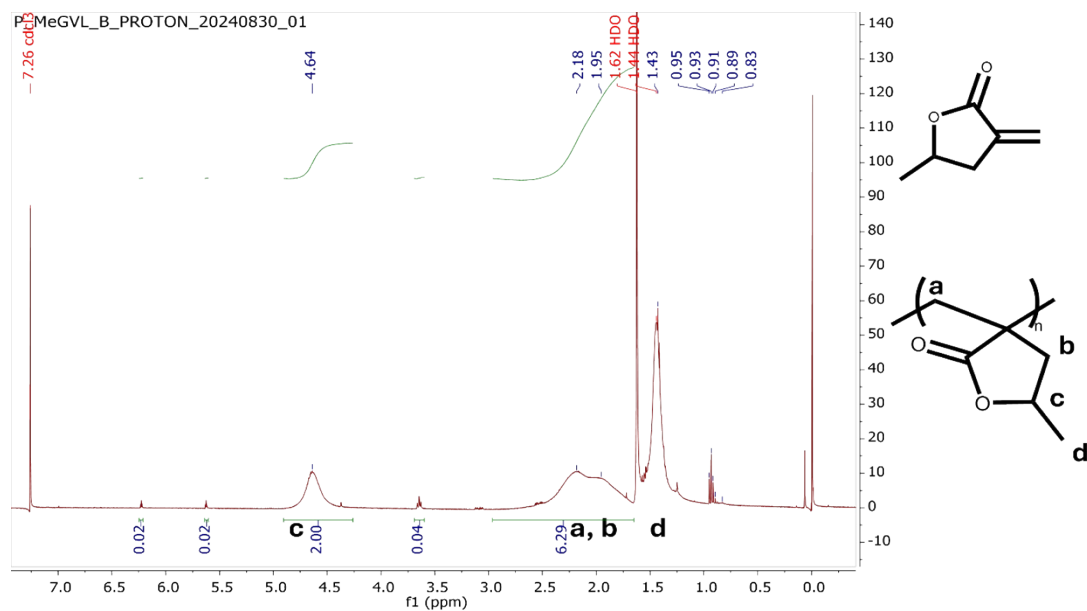

Figure S3.  $^1\text{H}$ -NMR of PMeGVL.

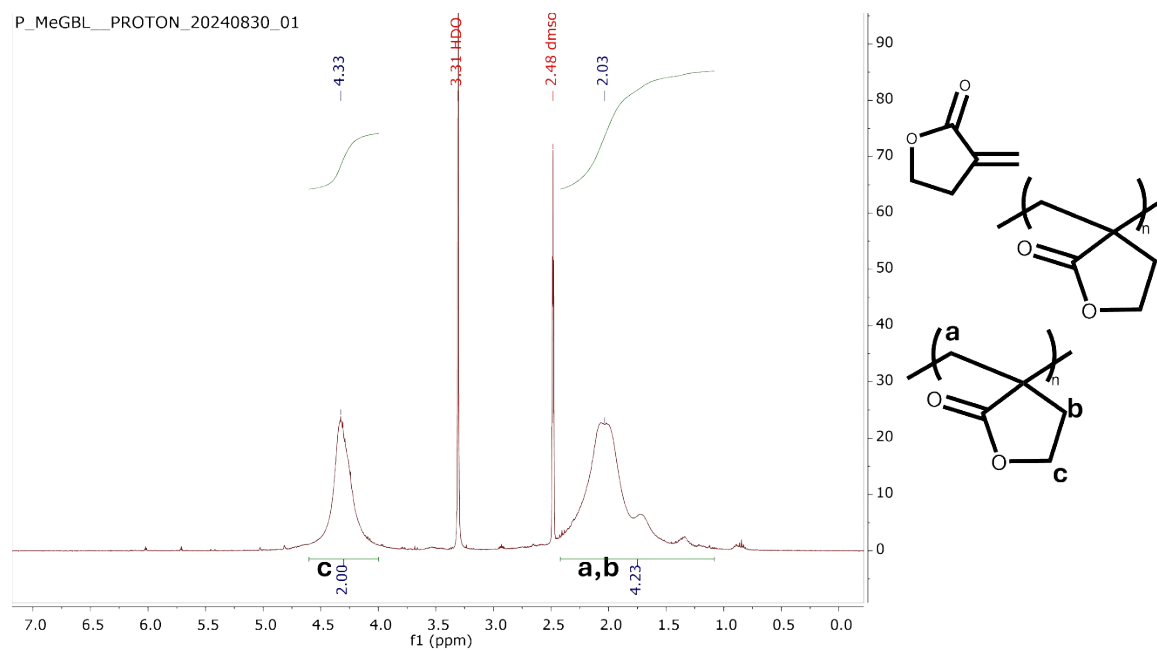

Figure S4.  $^1\text{H}$ -NMR of PMeGBL.

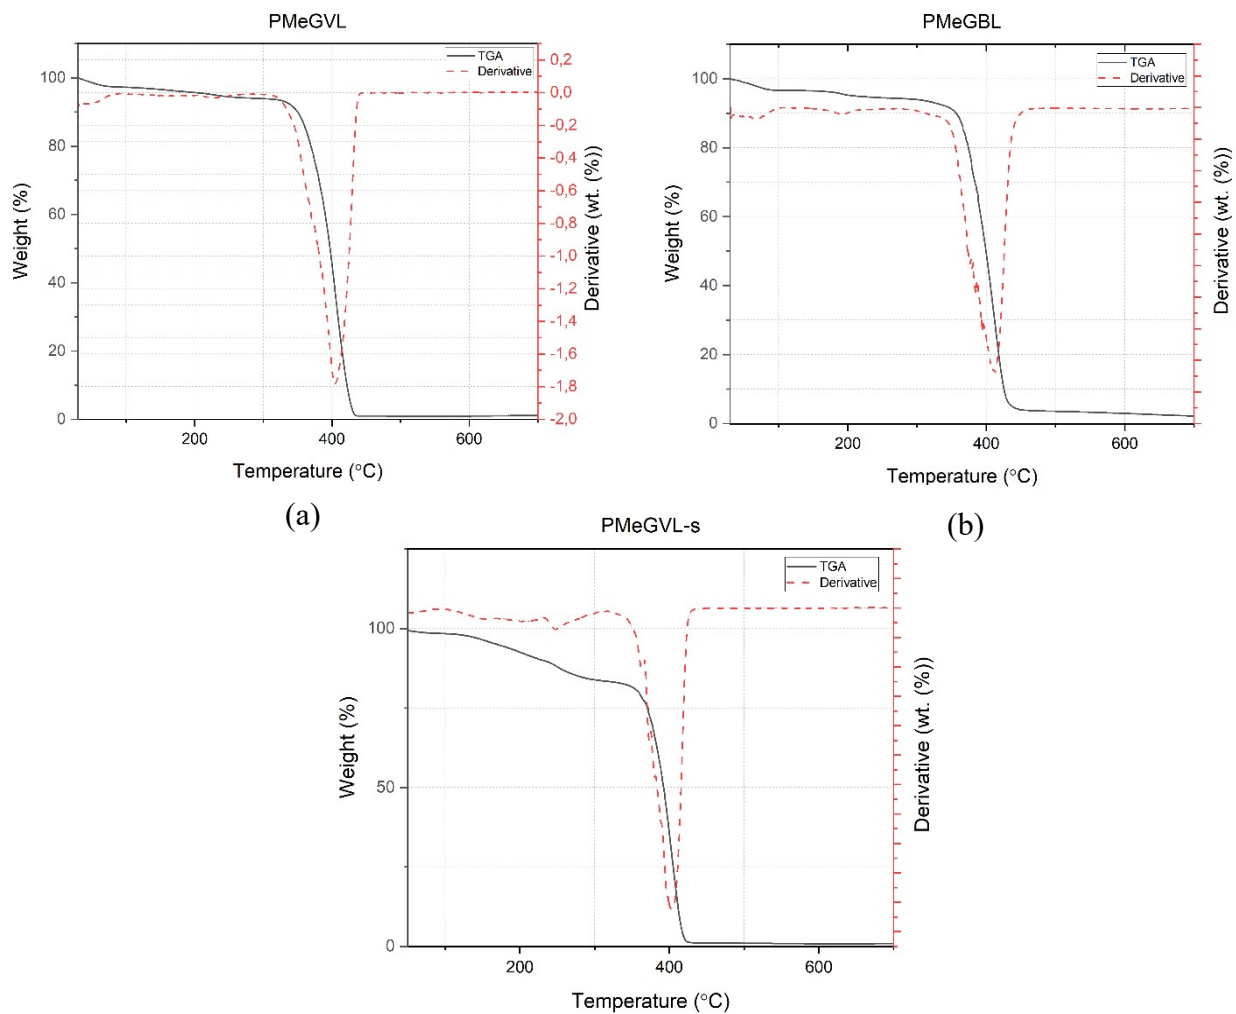

Figure S5. TGA and DTG graphs of (a) PMeGVL, (b) PMeGBL and (c) PMeGVL-s.

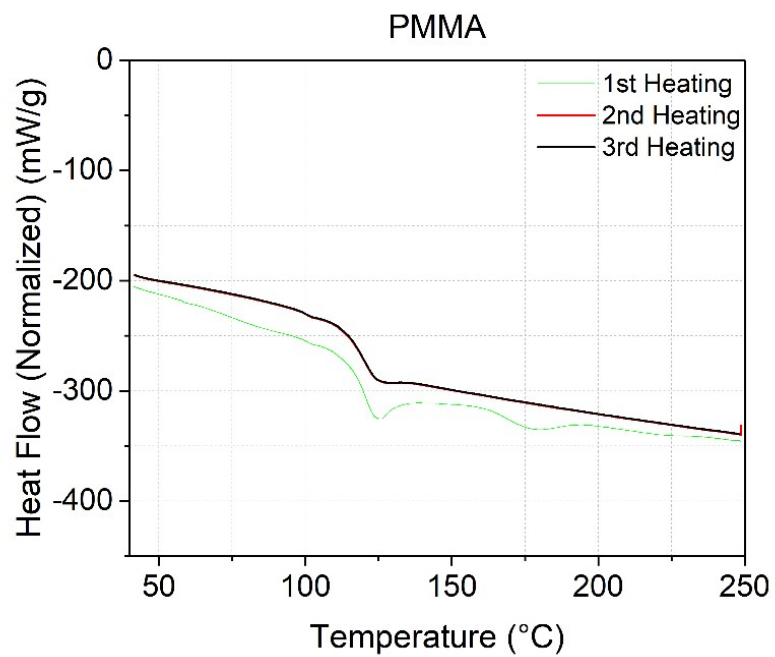

Figure S6. DSC diagram of commercial PMMA.

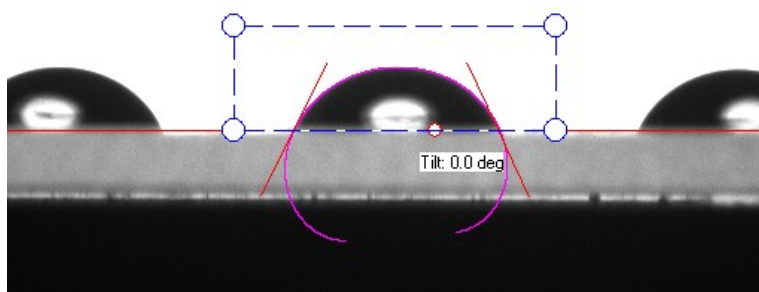

Figure S7. Digital image of an exemplary WCA on casted PMeGVL film.

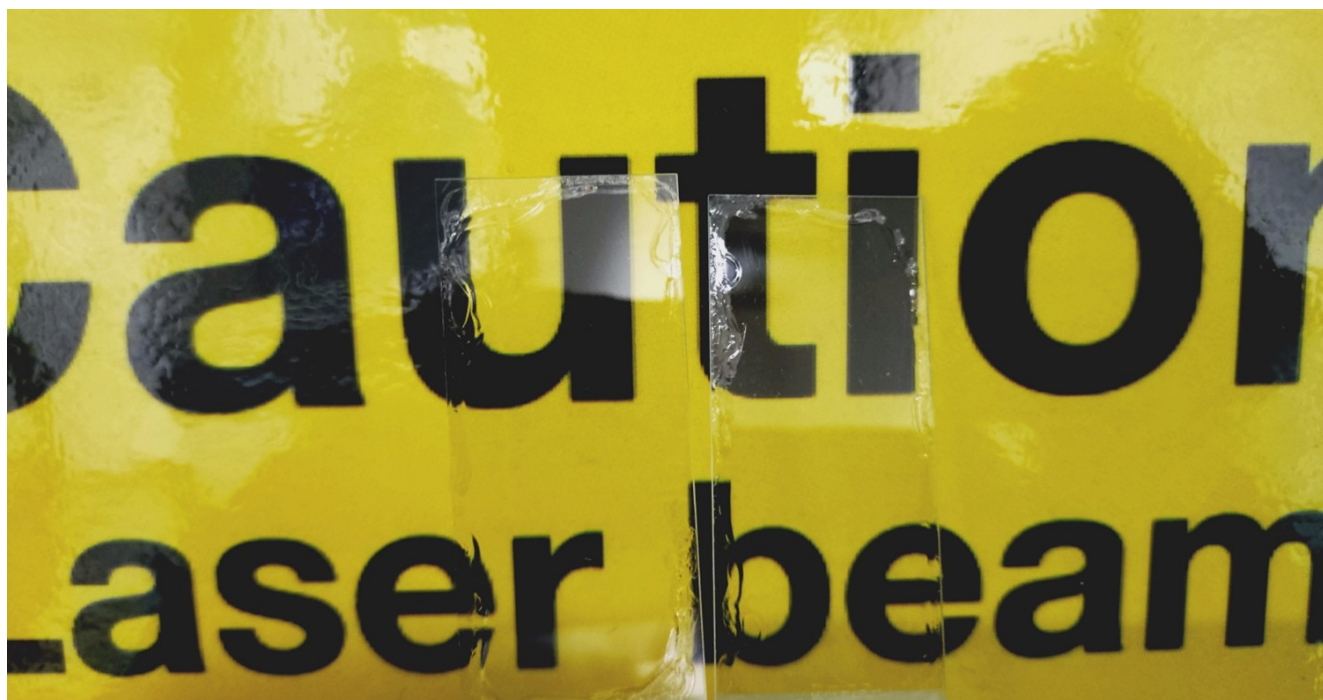

Figure S8. Digital image of casted polymer films (left: PMeGVL, right: PMeGBL).
